# Supplementary material for: Air pollutants, seasonal influenza, and acute otitis media in children: a population-based analysis using 22-year hospitalization data
Source: PubMed Central journal article supplement (PMC11170825; doi:10.1186/s12889-024-18962-4), 2024-06-13

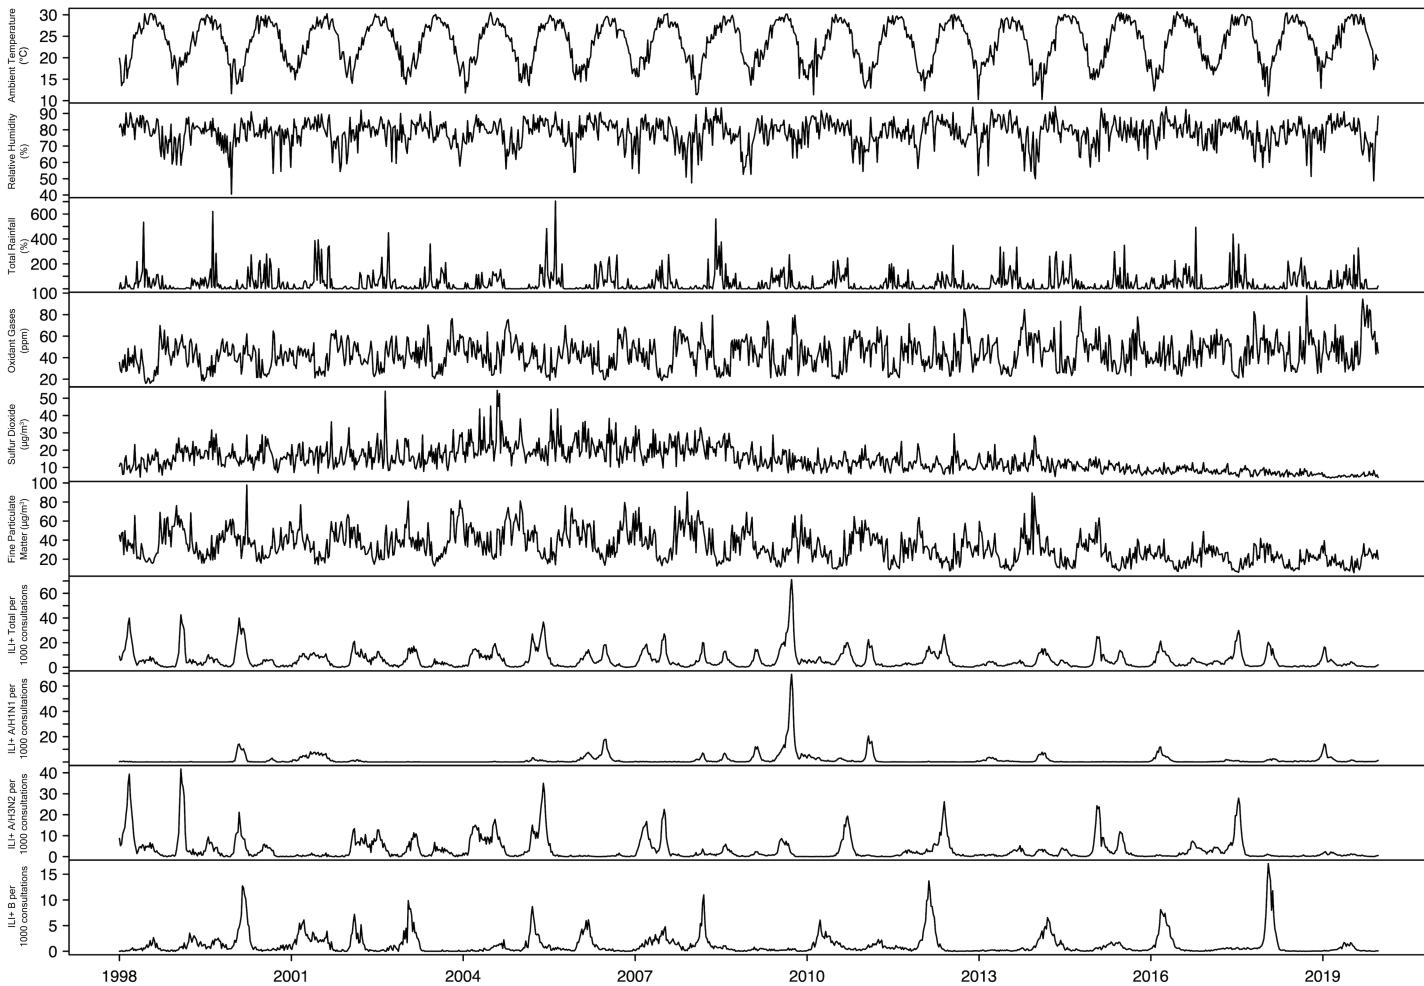

Supplement: 12889_2024_18962_MOESM1_ESM.pdf [file 12889_2024_18962_MOESM1_ESM.pdf]
